# Supplementary material
Source: MDPI journal article supplement (https://www.mdpi.com/2073-4344/9/4/374)
Supplement: s1 [file s1]

# Supporting Information

## Liquid-Phase Catalytic Oxidation of Limonene to Carvone over ZIF-67(Co)

Yizhou Li, Yepeng Yang, Daomei Chen, Zhifang Luo, Wei Wang, Yali Ao, Lin Zhang, Zhiying Yan \* and Jiaqiang Wang \*

National Center for International Research on Photoelectric and Energy Materials, Yunnan Provincial Collaborative Innovation Center of Green Chemistry for Lignite Energy, Yunnan Province Engineering Research Center of Photocatalytic Treatment of Industrial Wastewater, The Universities' Center for Photocatalytic Treatment of Pollutants in Yunnan Province, School of Chemical Sciences & Technology, Yunnan University, Kunming 650091, China; zh11111ou@163.com (Y.L.); mondaysunday1234@163.com (Y.Y.); dmchen@ynu.edu.cn (D.C.); zhifangluo@126.com (Z.L.); wangwei2@ynu.edu.cn (W.W.); yl\_a2019@163.com (Y.A.); echolanchen@163.com (L.Z.)

\* Correspondence: zhyyan@ynu.edu.cn (Z.Y.); jqwang@ynu.edu.cn (J.W.); Tel.: +86-871-6503-1567 (Z.Y.); Tel.: +86-871-6503-1567 (J.W.)

### Supplementary 1. The synthesis of other MOFs

a. The synthesis of MIL-101(Cr): A certain amount of terephthalic acid was dissolved in 30 mL water and added with  $\text{Cr}(\text{NO}_3)_3 \cdot 9\text{H}_2\text{O}$ . Ultrasound was applied for half an hour and pushed it into the reactor. Materials were placed in an oven and reacted at 210 °C for 6 hours. Then, materials were taken out and drained to obtain a green solid after cooling down to room temperature. It was purified by centrifugation with added DMF. Finally, the solid was put into the oven for drying and a green powder was obtained.

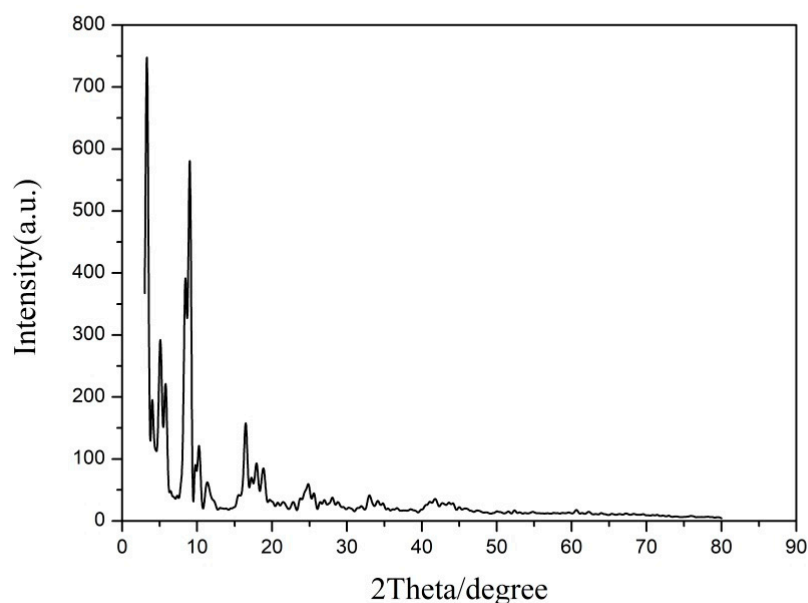

Supplementary Figure 1. XRD patterns of MIL-101(Cr)

b. The synthesis of MIL-125(Ti): Certain quantities of DMF and methanol were added to a reaction kettle, and then Titanium tetraisopropoxide (TTIP, 97%, Sigma-Aldrich, St. Louis, MO, USA) and terephthalic acids were added to this reaction kettle. The mixture was put into a reactor after ultrasonic treatment for 0.5 h, and placed in an oven at 150 °C for 16 h. The mixture was filtered and washed twice with DMF and methanol respectively after cooling down to room temperature. Finally, the powders were put in vacuum at 150 °C for 12 hours.

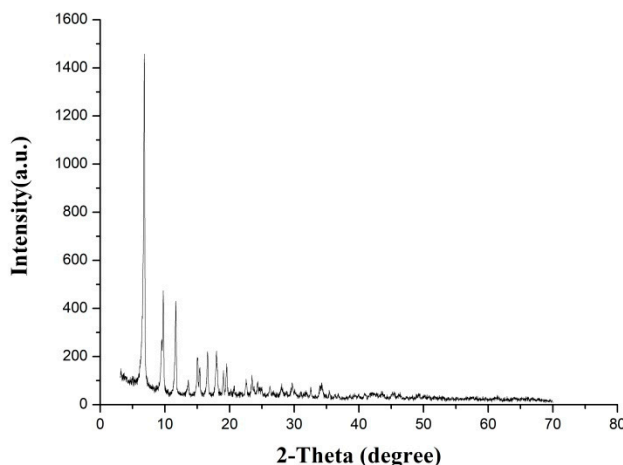

**Supplementary Figure 2. XRD patterns of MIL-125(Ti)**

c. The synthesis of HKUST-1(Cu): 25 mL absolute ethanol was stirred to dissolve in pyromellitic acid and transferred to the reactor. Then,  $\text{Cu}(\text{NO}_3)_2 \cdot \text{H}_2\text{O}$  and 25 mL distilled water were added to a 50 mL beaker. Ultrasound was used to dissolve it completely and solution **1** was obtained. Solution **1** was slowly added to the reaction kettle with continuous stirring until a gelatinous material was formed. Then, 25 mL DMF was added slowly to the reactor to obtain a clear and transparent blue solution. The solution was stirred continuously until a solid precipitate formed. The precipitated solids were filtered and washed three times by adding anhydrous ethanol. Finally, the solid was filtered and dried for half an hour at 70 °C to obtain a blue powder.

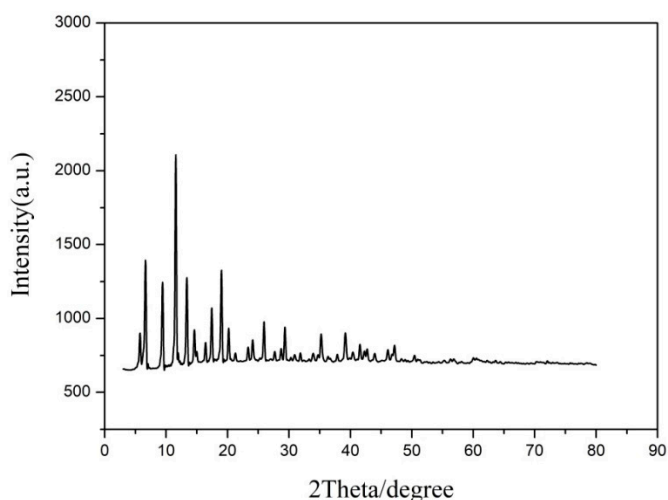

**Supplementary Figure 3. XRD patterns of HKUST-1(Cu)**

d. The synthesis of ZIF-8(Zn): Methanol and ammonia at a volume ratio of 1:5 were mixed in a glass beaker, and then 2-methylimidazole and  $\text{Zn(OH)}_2$  were added. The mixture was treated with ultrasound and placed at room temperature for two days. A white powder solid was obtained by filtration, washing, and drying.

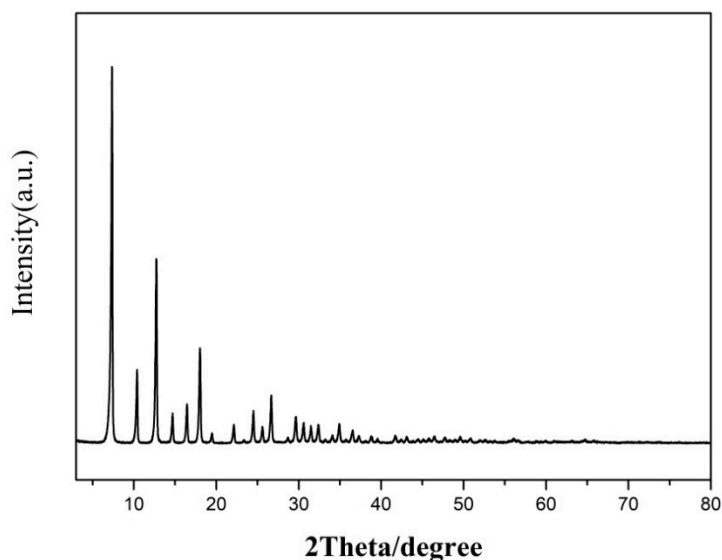

**Supplementary Figure 4.** XRD patterns of ZIF-8(Zn).

e. The synthesis of MIL-101(Fe):  $\text{FeCl}_3 \cdot 6\text{H}_2\text{O}$  and terephthalic acid were added to the reactor, and then 15 mL DMF was added to stir for 60 min. This mixture was transferred into a 110 °C oven and reacted for 20 h at constant temperature. Obtained material was dried and washed with DMF after cooling down to room temperature. Then, 30 mL of absolute ethanol was added and shocked at 60 °C for 3 h. Finally, it was filtered, washed, and dried at 70 °C to obtain a brick-red solid.

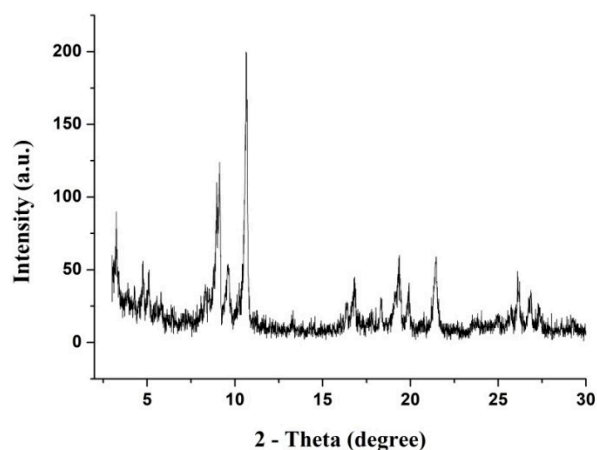

**Supplementary Figure 5.** XRD patterns of MIL-101(Fe).
